# Supplementary material for: Omics approaches in environmental effect assessment of engineered nanomaterials and nanoplastics
Source: Royal Society of Chemistry journal article supplement (doi:10.1039/d4en01169d), 2025-01-01
Supplement: d4en01169d2.xlsx [file d4en01169d2.xlsx]

## Sheet: Research papers (NP-organism)
Table S1. List of retrieved and analyzed research articles
Year	Reference	DOI	Nanoparticle	Species	Phylum	Technology/approach	Remarks
2015	Li et al., 2015	10.3109/17435390.2014.976851	Ag	Eisenia fetida (redworm)	Annelida	Metabolomics
2015	Novo et al., 2015	10.1016/j.envpol.2015.07.010	Ag	Eisenia fetida (redworm)	Annelida	Transcriptomics
2015	Li et al., 2015	10.1016/j.ecoenv.2015.05.005	Ag	Daphnia magna	Arthropoda	Metabolomics
2015	Garcia-Sanchez et al., 2015	10.1186/s12864-015-1530-4	Ag	Arabidopsis thaliana (mouse-ear cress)	Streptophyta	Transcriptomics
2015	Mustafa et al., 2015	10.1016/j.jprot.2015.08.010	Al2O3	Glycine max L. (soybean)	Streptophyta	Proteomics
2015	Dominguez et al., 2015	10.1016/j.aquatox.2015.02.015	Au	Daphnia magna	Arthropoda	Transcriptomics
2015	Lankadurai et al., 2015	10.1016/j.ecoenv.2015.05.020	carbon (fullerene nC60)	Eisenia fetida (redworm)	Annelida	Metabolomics
2015	Ouyang et al., 2015	10.1021/acsami.5b05328	carbon (graphene oxide)	Chlorella vulgaris (green microalga)	Chlorophyta	Metabolomics
2015	Garcia-Sanchez et al., 2015	10.1186/s12864-015-1530-4	carbon (MWCNT)	Arabidopsis thaliana (mouse-ear cress)	Streptophyta	Transcriptomics
2015	Marmiroli et al., 2015	10.3389/fpls.2015.01104	CdS	Arabidopsis thaliana (mouse-ear cress)	Streptophyta	Multi-omics (transcriptomics, proteomics)
2015	Majumdar et al., 2015	10.1021/acs.est.5b03452	CeO2	Phaseolus vulgaris L. (common bean)	Streptophyta	Proteomics
2015	Ratnasekhar et al., 2015	10.3109/17435390.2014.993345	TiO2	Caenorhabditis elegans	Nematoda	Metabolomics
2015	Garcia-Sanchez et al., 2015	10.1186/s12864-015-1530-4	TiO2	Arabidopsis thaliana (mouse-ear cress)	Streptophyta	Transcriptomics
2015	Landa et al., 2015	10.1021/acs.est.5b03330	ZnO	Arabidopsis thaliana (mouse-ear cress)	Streptophyta	Transcriptomics
2016	Kang et al., 2016	10.1016/j.bbrc.2016.09.139	Ag	Danio rerio (zebrafish)	Chordata	Transcriptomics
2016	Hossain et al., 2016	10.1016/j.jhazmat.2015.10.071	Ag	Glycine max L. (soybean)	Streptophyta	Proteomics
2016	Mustafa et al., 2016	10.1016/j.jprot.2016.07.027	Ag	Glycine max L. (soybean)	Streptophyta	Proteomics
2016	Hossain et al., 2016	10.1016/j.jhazmat.2015.10.071	Al2O3	Glycine max L. (soybean)	Streptophyta	Proteomics
2016	Yasmeen et al., 2016	10.1016/j.jprot.2016.03.014	Al2O3	Glycine max L. (soybean)	Streptophyta	Proteomics
2016	Ren et al., 2016	10.1016/j.biomaterials.2016.03.036	carbon (graphene oxide)	Danio rerio (zebrafish)	Chordata	Metabolomics
2016	Taylor et al., 2016	10.3109/17435390.2014.1002868	CeO2	Chlamydomonas reinhardtii (green microalga)	Chlorophyta	Multi-omics (transcriptomics, metabolomics)
2016	Zhao et al., 2016	10.1039/c6en00093b	Cu	Cucumis sativus L. (cucumber)	Streptophyta	Metabolomics
2016	Zhao et al., 2016	10.1021/acs.est.5b05011	Cu	Cucumis sativus L. (cucumber)	Streptophyta	Metabolomics
2016	Zhao et al., 2016	10.1021/acs.est.6b02763	Cu(OH)2	Lactuca sativa L. (lettuce)	Streptophyta	Metabolomics
2016	Zhao et al., 2016	10.1016/j.impact.2016.08.005	Cu(OH)2	Lactuca sativa L. (lettuce)	Streptophyta	Metabolomics
2016	Yasmeen et al., 2016	10.1016/j.bbapap.2016.08.009	Fe	Triticum aestivum (wheat)	Streptophyta	Proteomics
2016	Hu et al., 2016	10.1039/c5tx00383k	SiO2	Danio rerio (zebrafish)	Chordata	Transcriptomics
2016	Rajapakse et al., 2016	10.3109/17435390.2015.1091107	TiO2	Tetrahymena thermophila	Protozoa	Proteomics
2016	Choi et al., 2016	10.1371/journal.pone.0160763	ZnO	Danio rerio (zebrafish)	Chordata	Transcriptomics
2016	Hossain et al., 2016	10.1016/j.jhazmat.2015.10.071	ZnO	Glycine max L. (soybean)	Streptophyta	Proteomics
2017	Gomes et al., 2017	10.1039/c6en00652c	Ag	Enchytraeus crypticus	Annelida	Transcriptomics
2017	Zhang et al., 2017	10.1016/j.watres.2017.02.046	Ag	Daphnia similis	Arthropoda	Metabolomics
2017	Hou et al., 2017	10.1021/acs.est.7b03918	Ag	Daphnia magna	Arthropoda	Transcriptomics
2017	Soria et al., 2017	10.1039/c7en00555e	Ag	Arabidopsis thaliana (mouse-ear cress)	Streptophyta	Metabolomics
2017	Jin et al., 2017	10.1016/j.envpol.2017.04.073	Al2O3	Arabidopsis thaliana (mouse-ear cress)	Streptophyta	Transcriptomics
2017	Du et al., 2017	10.1016/j.jhazmat.2016.10.052	carbon (fullerene nC60)	Scenedesmus obliquus	Chlorophyta	Multi-omics (transcriptomics, metabolomics)
2017	Zhang et al., 2017	10.1021/acs.est.7b01922	carbon (graphene oxide)	Danio rerio (zebrafish)	Chordata	Multi-omics (transcriptomics, metabolomics)
2017	McGehee et al., 2017	10.1021/acsami.7b10511	carbon (MWCNT)	Solanum lycopersicum L. (tomato)	Streptophyta	Metabolomics
2017	Binelli et al., 2017	10.1080/17435390.2017.1306130	carbon nanopowder	Danio rerio (zebrafish)	Chordata	Proteomics
2017	Tumburu et al., 2017	10.1002/etc.3500	CeO2	Arabidopsis thaliana (mouse-ear cress)	Streptophyta	Transcriptomics
2017	Wang et al., 2017	10.1080/17435390.2017.1290291	Cu	Epinephelus coioides (orange-spotted grouper)	Chordata	Multi-omics (transcriptomics, proteomics)
2017	Zhao et al., 2017	10.1016/j.plaphy.2016.02.010	Cu	Cucumis sativus L. (cucumber)	Streptophyta	Metabolomics
2017	Zhao et al., 2017	10.1021/acs.est.7b02163	Cu(OH)2	Spinacia oleracea	Streptophyta	Metabolomics
2017	Zhao et al., 2017	10.1021/acssuschemeng.7b01968	Cu(OH)2	Zea mays (maize)	Streptophyta	Metabolomics
2017	Cappello et al., 2017	10.1016/j.cbpc.2017.02.002	CuO	Arbacia lixula (sea urchin)	Echinodermata	Metabolomics
2017	Landa et al., 2017	10.1021/acs.est.7b02265	CuO	Arabidopsis thaliana (mouse-ear cress)	Streptophyta	Transcriptomics
2017	Gonzalez-Moragas et al., 2017	10.1080/17435390.2017.1342011	Fe oxide, superparamagnetic (SPION)	Caenorhabditis elegans	Nematoda	Transcriptomics
2017	Villacis et al., 2017	10.1016/j.aquatox.2017.08.004	Fe2O3	Danio rerio (zebrafish)	Chordata	Transcriptomics
2017	Veneman et al., 2017	10.1016/j.aquatox.2017.06.014	polystyrene nanoplastics	Danio rerio (zebrafish)	Chordata	Transcriptomics
2017	Wu et al., 2017	10.1016/j.envpol.2017.06.062	TiO2	Oryza sativa L. (rice)	Streptophyta	Metabolomics
2017	Zahra et al., 2017	10.1021/acs.jafc.7b01843	TiO2	Oryza sativa L. (rice)	Streptophyta	Metabolomics
2017	Tumburu et al., 2017	10.1002/etc.3500	TiO2	Arabidopsis thaliana (mouse-ear cress)	Streptophyta	Transcriptomics
2017	Xun et al., 2017	10.1016/j.envpol.2017.05.066	ZnO	Zea mays (maize)	Streptophyta	Transcriptomics
2018	Wang et al., 2018	10.1016/j.ecoenv.2018.07.080	Ag	Daphnia similis	Arthropoda	Metabolomics
2018	Cambier et al., 2018	10.1016/j.scitotenv.2017.08.115	Ag	Danio rerio (zebrafish)	Chordata	Transcriptomics
2018	Lacave et al., 2018	10.1016/j.scitotenv.2018.06.128	Ag	Danio rerio (zebrafish)	Chordata	Transcriptomics
2018	Pan et al., 2018	10.1039/C8EN00924D	Ag	Euplotes vannus	Ciliophora	Transcriptomics
2018	Zhang et al., 2018	10.1039/c8en00738a	Ag	Microcystis aeruginosa	Cyanobacteria	Metabolomics
2018	Bouallegui et al., 2018	10.1016/j.aquatox.2018.04.013	Ag	Mytilus galloprovincialis (Mediterranean mussel)	Mollusca	Proteomics
2018	Jeong et al., 2018	10.1080/17435390.2018.1529835	Ag	Caenorhabditis elegans	Nematoda	Transcriptomics
2018	Zhang et al., 2018	10.1021/acs.est.8b02440	Ag	Cucumis sativus L. (cucumber)	Streptophyta	Metabolomics
2018	Stefanic et al., 2018	10.1016/j.chemosphere.2018.06.128	Ag	Nicotiana tabacum (tobacco)	Streptophyta	Proteomics
2018	Zou et al., 2018	10.1016/j.ecoenv.2018.05.009	carbon (graphene oxide)	Danio rerio (zebrafish)	Chordata	Proteomics
2018	Li et al., 2018	10.1039/c7en00803a	carbon (graphene oxide)	Oryza sativa L. (rice)	Streptophyta	Multi-omics (metabolomics, proteomics)	co-exposure with PAH
2018	Deng et al., 2018	10.1016/j.jhazmat.2018.05.063	carbon (graphene quantum dots)	Danio rerio (zebrafish)	Chordata	Transcriptomics
2018	Fan et al., 2018	10.1016/j.envpol.2017.10.116	carbon (MWCNT)	Arabidopsis thaliana (mouse-ear cress)	Streptophyta	Proteomics	single and co-exposure with paraquat
2018	Chen et al., 2018	10.1039/c8en00674a	carbon nanodots	Arabidopsis thaliana (mouse-ear cress)	Streptophyta	Multi-omics (transcriptomics, metabolomics)
2018	Falanga et al., 2018	10.1016/j.aquatox.2018.03.001	CdSe	Daphnia magna	Arthropoda	Metabolomics	transgenerational
2018	Poirier et al., 2018	10.1016/j.ecoenv.2018.01.043	CdSe	Phaeodactylum tricornutum (diatom)	Ochrophyta	Proteomics
2018	Salehi et al., 2018	10.1016/j.scitotenv.2017.10.159	CeO2	Phaseolus vulgaris L. (common bean)	Streptophyta	Multi-omics (metabolomics, proteomics)
2018	Huang et al., 2018	10.1016/j.impact.2018.08.008	Cu	Cucumis sativus L. (cucumber)	Streptophyta	Metabolomics
2018	Yasmeen et al., 2018	10.1007/s11105-018-1082-2	Cu	Triticum aestivum (wheat)	Streptophyta	Proteomics
2018	Zhao et al., 2018	10.1021/acs.jafc.7b01306	Cu(OH)2	Cucumis sativus L. (cucumber)	Streptophyta	Metabolomics
2018	Zhao et al., 2018	10.1021/acs.jafc.7b01306	Cu(OH)2	Zea mays (maize)	Streptophyta	Metabolomics
2018	Maria et al., 2018	10.1002/pmic.201800091	CuO	Enchytraeus crypticus (white worm)	Annelida	Proteomics
2018	Châtel et al., 2018	10.1016/j.cbpc.2018.01.003	CuO	Mytilus edulis (blue mussel)	Mollusca	Transcriptomics
2018	Zheng et al., 2018	10.1016/j.scitotenv.2017.12.018	Fe3O4	Danio rerio (zebrafish)	Chordata	Transcriptomics
2018	Zheng et al., 2018	10.1038/s41598-018-26499-x	FeS	Danio rerio (zebrafish)	Chordata	Transcriptomics
2018	Yang et al., 2018	10.1016/j.chemosphere.2018.01.140	MoS2	Saccharomyces cerevisiae (baker's yeast)	Fungi	Metabolomics
2018	Zhang et al., 2018	10.1016/j.ecoenv.2018.02.012	TiO2	Physarum polycephalum	Protozoa	Metabolomics
2018	Yuan et al., 2018	10.1021/acs.est.8b04444	WS2	Chlorella vulgaris (green microalga)	Chlorophyta	Metabolomics
2018	Chupani et al., 2018	10.1016/j.scitotenv.2017.08.129	ZnO	Cyprinus carpio (Eurasian carp)	Chordata	Proteomics
2018	Pullagurala et al., 2018	10.1016/j.plaphy.2018.08.037	ZnO	Coriandrurn sativum (cilantro)	Streptophyta	Metabolomics
2019	Chen et al., 2019	10.1016/j.ecoenv.2019.01.055	Ag	Bombyx mori (silkworm)	Arthropoda	Multi-omics (transcriptomics, proteomics)
2019	Wang et al., 2019	10.1016/j.jes.2018.05.017	Ag	Scenedesmus obliquus	Chlorophyta	Metabolomics
2019	Babele et al., 2019	10.3389/fphar.2019.01016	Ag	Saccharomyces cerevisiae (baker's yeast)	Fungi	Metabolomics
2019	Horstmann et al., 2019	10.1093/femsyr/foz003	Ag	Saccharomyces cerevisiae (baker's yeast)	Fungi	Transcriptomics
2019	Duroudier et al., 2019	10.1016/j.cbpc.2019.03.010	Ag	Mytilus galloprovincialis (Mediterranean mussel)	Mollusca	Transcriptomics
2019	Jhanzab et al., 2019	10.3390/ijms20040825	Ag	Triticum aestivum (wheat)	Streptophyta	Proteomics
2019	Stefanic et al., 2019	10.1007/s11356-019-05552-w	Ag	Nicotiana tabacum (tobacco)	Streptophyta	Proteomics
2019	Zhang et al., 2019	10.1016/j.envpol.2019.06.032	Ag	Arabidopsis thaliana (mouse-ear cress)	Streptophyta	Transcriptomics
2019	Teles et al., 2019	10.3389/fmars.2019.00147	Au	Sparus aurata (gilt-head bream)	Chordata	Transcriptomics
2019	Wang et al., 2019	10.1016/j.envpol.2019.113181	carbon (fullerene nC60)	Daphnia magna	Arthropoda	Transcriptomics
2019	Sun et al., 2019	10.1016/j.ecoenv.2019.05.011	carbon (graphene oxide)	Danio rerio (zebrafish)	Chordata	Multi-omics (transcriptomics, proteomics)
2019	Garacci et al., 2019	10.1039/c8en00987b	carbon (graphene)	Nitzschia palea (diatom)	Ochrophyta	Transcriptomics
2019	Barrick et al., 2019	10.1016/j.aquatox.2018.11.020	carbon nanofibers	Mytilus edulis (blue mussel)	Mollusca	Transcriptomics
2019	Zhang et al., 2019	10.1021/acs.est.9b00593	CeO2	Spinacia oleracea	Streptophyta	Metabolomics
2019	Tan et al., 2019	10.1080/17435390.2018.1553253	CuO	Saccharomyces cerevisiae (baker's yeast)	Fungi	Transcriptomics
2019	Chavez-Soria, 2019	10.1016/j.scitotenv.2019.07.249	CuO	Arabidopsis thaliana (mouse-ear cress)	Streptophyta	Metabolomics
2019	Ma et al., 2019	10.1021/acssuschemeng.9b01433	CuO	Solanum lycopersicum L. (tomato)	Streptophyta	Transcriptomics
2019	Zhao et al., 2019	10.1039/c9en00137a	Fe3O4	Zea mays (maize)	Streptophyta	Metabolomics
2019	Gomes et al., 2019	10.1016/j.envpol.2018.10.123	Ni	Enchytraeus crypticus (white worm)	Annelida	Transcriptomics
2019	Feng et al., 2019	10.1039/c9en00807a	polystyrene nanoplastics	Synechococcus elongatus	Cyanobacteria	Metabolomics
2019	Kim et al., 2019	10.1016/j.envpol.2018.12.043	polystyrene nanoplastics	Caenorhabditis elegans	Nematoda	Metabolomics
2019	Zhao et al., 2019	10.1039/c9en00137a	SiO2	Zea mays (maize)	Streptophyta	Metabolomics
2019	Aljagic et al., 2019	10.1016/j.jhazmat.2019.121389	TiO2	Paracentrotus lividus (sea urchin)	Echinodermata	Multi-omics (transcriptomics, metabolomics)
2019	Zhao et al., 2019	10.1039/c9en00137a	TiO2	Zea mays (maize)	Streptophyta	Metabolomics
2019	Xu et al., 2019	10.1021/acs.est.9b02182	TiO2	Oryza sativa L. (rice)	Streptophyta	Transcriptomics
2019	Lin et al., 2019	10.1021/acs.est.9b00251	ZnO	Daphnia magna	Arthropoda	Proteomics
2019	Vicente et al., 2019	10.1007/s11356-019-05057-6	ZnO	Synechococcus elongatus	Cyanobacteria	Transcriptomics
2019	Babele et al., 2019	10.1016/j.toxrep.2018.12.001	ZnO	Saccharomyces cerevisiae (baker's yeast)	Fungi	Multi-omics (proteomics, metabolomics)
2019	Starnes et al., 2019	10.1016/j.envpol.2019.01.077	ZnO	Caenorhabditis elegans	Nematoda	Transcriptomics
2019	Wan et al., 2019	10.1021/acs.est.8b06641	ZnO	Arabidopsis thaliana (mouse-ear cress)	Streptophyta	Transcriptomics
2020	Roelofs et al., 2020	10.1039/c9en01144g	Ag	Lumbricus rubellus (humus earthworm)	Annelida	Transcriptomics
2020	Artal et al., 2020	10.1016/j.envpol.2020.113963	Ag	Parhyale hawaiensis (amphipod)	Arthropoda	Transcriptomics
2020	Zhang et al., 2020	10.1016/j.envpol.2020.114743	Ag	Chlorella vulgaris (green microalga)	Chlorophyta	Proteomics
2020	Xiang et al., 2020	10.1016/j.jhazmat.2020.122562	Ag	Cyprinus carpio (Eurasian carp)	Chordata	Proteomics
2020	Huang et al., 2020	10.1021/acs.est.0c05300	Ag	Nostoc sphaeroides	Cyanobacteria	Metabolomics
2020	Barros et al., 2020	10.1016/j.scitotenv.2019.135385	Ag	Articulospora tetracladia	Fungi	Proteomics
2020	Shen et al., 2020	10.1016/j.jhazmat.2020.122063	Ag	Fusarium solani	Fungi	Transcriptomics
2020	Liu et al., 2020	10.1038/s41598-020-77521-0	Ag	Poterioochromonas malhamensis	Protozoa	Metabolomics
2020	Kruszka et al., 2020	10.1016/j.scitotenv.2019.135361	Ag	Arabidopsis thaliana (mouse-ear cress)	Streptophyta	Metabolomics
2020	Li et al., 2020	10.1021/acs.est.9b06096	Ag	Oryza sativa L. (rice)	Streptophyta	Metabolomics
2020	Kumari et al., 2020	10.3389/fbioe.2020.00242	Ag	Arabidopsis thaliana (mouse-ear cress)	Streptophyta	Proteomics
2020	Mustafa et al., 2020	10.1016/j.jprot.2020.103833	Ag	Glycine max L. (soybean)	Streptophyta	Proteomics
2020	Viau et al., 2020	10.7717/peerj.8684	Ag	Caenorhabditis elegans	Nematoda	Transcriptomics
2020	Barretto et al., 2020	10.1016/j.aquatox.2020.105445	Au	Sparus aurata (gilt-head bream)	Chordata	Proteomics
2020	Perrier et al., 2020	10.1002/etc.4858	Au	Anguilla anguilla (European eel)	Chordata	Transcriptomics
2020	Li et al., 2020	10.1021/acs.estlett.9b00726	black P	Chlorella vulgaris (green microalga)	Chlorophyta	Metabolomics
2020	Sforzini et al., 2020	10.1016/j.chemosphere.2019.125707	carbon (fullerene nC60)	Mytilus edulis (blue mussel)	Mollusca	Transcriptomics
2020	Li et al., 2020	10.1021/acs.est.9b06096	carbon (fullerene nC60)	Oryza sativa L. (rice)	Streptophyta	Metabolomics
2020	Li et al., 2020	10.1021/acs.est.9b06096	carbon (graphene oxide quantum dots)	Oryza sativa L. (rice)	Streptophyta	Metabolomics
2020	Ouyang et al., 2020	10.1021/acs.est.9b07460	carbon (graphene oxide)	Chlorella vulgaris (green microalga)	Chlorophyta	Multi-omics (metabolomics, proteomics)
2020	Zou et al., 2020	10.1016/j.scitotenv.2020.138486	carbon (graphene oxide)	Danio rerio (zebrafish)	Chordata	Multi-omics (proteomics, metabolomics)	Co-exposure with tris(1,3-dichloro-2-propyl) phosphate (TDCIPP)
2020	Li et al., 2020	10.1021/acs.est.9b06096	carbon (graphene oxide)	Oryza sativa L. (rice)	Streptophyta	Metabolomics
2020	Li et al., 2020	10.1021/acs.est.9b06096	carbon (SWCNT)	Oryza sativa L. (rice)	Streptophyta	Metabolomics
2020	Wan et al., 2020	10.1039/d0en00582g	carbon (SWCNT, horns)	Sophora alopecuroides	Streptophyta	Metabolomics
2020	Sun et al., 2020	10.1021/acs.est.9b07133	carbon (SWCNT, horns)	Arabidopsis thaliana (mouse-ear cress)	Streptophyta	Multi-omics (transcriptomics, metabolomics)
2020	Gallo et al., 2020	10.3390/nano10061214	CdS	Saccharomyces cerevisiae (baker's yeast)	Fungi	Proteomics
2020	Tian et al., 2020	10.1039/c9en00933g	CdS	Vicia faba L. (broad bean)	Streptophyta	Metabolomics
2020	Lacave et al., 2020	10.1016/j.chemosphere.2019.124588	CdSe	Danio rerio (zebrafish)	Chordata	Transcriptomics
2020	Rico et al., 2020	10.1016/j.scitotenv.2019.136487	CeO2	Triticum aestivum (wheat)	Streptophyta	Metabolomics
2020	An et al., 2020	10.1039/d0en00387e	CeO2	Gossypium hirsutum L. (cotton)	Streptophyta	Transcriptomics
2020	Li et al., 2020	10.1021/acs.est.9b06096	Cu	Oryza sativa L. (rice)	Streptophyta	Metabolomics
2020	Wang et al., 2020	10.1016/j.envpol.2019.113647	CuO	Chlorella vulgaris (green microalga)	Chlorophyta	Metabolomics
2020	Li et al., 2020	10.1021/acs.est.9b06096	Fe	Oryza sativa L. (rice)	Streptophyta	Metabolomics
2020	Genevière et al., 2020	10.1080/17435390.2020.1827074	Fe2O3	Micromonas commoda (green microalga)	Chlorophyta	Transcriptomics
2020	Genevière et al., 2020	10.1080/17435390.2020.1827074	Fe2O3	Ostreococcus tauri (green microalga)	Chlorophyta	Transcriptomics
2020	Genevière et al., 2020	10.1080/17435390.2020.1827074	Fe2O3	Nannochloris sp. (green microalga)	Chlorophyta	Transcriptomics
2020	Genevière et al., 2020	10.1080/17435390.2020.1827074	Fe2O3	Paracentrotus lividus (sea urchin)	Echinodermata	Transcriptomics
2020	Li et al., 2020	10.1016/j.scitotenv.2020.139795	Fe3O4	Zea mays (maize)	Streptophyta	Metabolomics
2020	Yan et al., 2020	10.1016/j.scitotenv.2020.137400	Fe3O4	Zea mays (maize)	Streptophyta	Metabolomics
2020	Lu et al., 2020	10.1039/d0en00214c	Mn3O4	Cucumis sativus L. (cucumber)	Streptophyta	Metabolomics
2020	Song et al., 2020	10.1016/j.impact.2020.100271	MoS2	Cucumis sativus L. (cucumber)	Streptophyta	Metabolomics
2020	Lykogianni et al., 2020	10.1016/j.pestbp.2020.02.001	PEI	Verticillium dahliae Kleb	Fungi	Metabolomics
2020	Zhang et al., 2020	10.1016/j.chemosphere.2019.124563	polystyrene nanoplastics	Daphnia pulex	Arthropoda	Transcriptomics
2020	Ding et al., 2020	10.1016/j.jhazmat.2020.122693	polystyrene nanoplastics	Oreochromis aureus (red tilapia)	Chordata	Metabolomics
2020	Pedersen et al., 2020	10.1016/j.envpol.2020.115090	polystyrene nanoplastics	Danio rerio (zebrafish)	Chordata	Transcriptomics
2020	Kim et al., 2020	10.1016/j.jhazmat.2020.123005	polystyrene nanoplastics	Caenorhabditis elegans	Nematoda	Multi-omics (transcriptomics, metabolomics)
2020	Lian et al., 2020	10.1016/j.envpol.2020.114498	polystyrene nanoplastics	Triticum aestivum (wheat)	Streptophyta	Metabolomics	co-exposure
2020	Viau et al., 2020	10.7717/peerj.8684	SiO2	Caenorhabditis elegans	Nematoda	Transcriptomics
2020	Li et al., 2020	10.1021/acs.est.9b06096	SiO2	Oryza sativa L. (rice)	Streptophyta	Metabolomics
2020	Zhu et al., 2020	10.1016/j.scitotenv.2020.137492	TiO2	Eisenia fetida (redworm)	Annelida	Multi-omics (transcriptomics, metabolomics)
2020	Li et al., 2020	10.1021/acs.est.9b06096	TiO2	Oryza sativa L. (rice)	Streptophyta	Metabolomics
2020	Song et al., 2020	10.1016/j.impact.2020.100271	TiO2	Cucumis sativus L. (cucumber)	Streptophyta	Metabolomics
2020	Zhang et al., 2020	10.1007/s11783-020-1282-5	TiO2	Oryza sativa L. (rice)	Streptophyta	Metabolomics
2020	He et al., 2020	10.1021/acs.est.0c00663	ZnO	Enchytraeus crypticus	Annelida	Metabolomics
2020	Novo et al., 2020	10.1039/c9en01124b	ZnO	Eisenia fetida (redworm)	Annelida	Transcriptomics
2020	Genevière et al., 2020	10.1080/17435390.2020.1827074	ZnO	Micromonas commoda (green microalga)	Chlorophyta	Transcriptomics
2020	Genevière et al., 2020	10.1080/17435390.2020.1827074	ZnO	Ostreococcus tauri (green microalga)	Chlorophyta	Transcriptomics
2020	Genevière et al., 2020	10.1080/17435390.2020.1827074	ZnO	Nannochloris sp. (green microalga)	Chlorophyta	Transcriptomics
2020	Genevière et al., 2020	10.1080/17435390.2020.1827074	ZnO	Paracentrotus lividus (sea urchin)	Echinodermata	Transcriptomics
2020	Li et al., 2020	10.1021/acs.est.9b06096	ZnO	Oryza sativa L. (rice)	Streptophyta	Metabolomics
2020	Wan et al., 2020	10.1039/d0en00582g	ZnO	Sophora alopecuroides	Streptophyta	Metabolomics
2020	Sun et al., 2020	10.1039/d0en00723d	ZnO	Solanum lycopersicum L. (tomato)	Streptophyta	Multi-omics (transcriptomics, metabolomics)
2021	Maria et al., 2021	10.1016/j.envpol.2021.117571	Ag	Enchytraeus crypticus	Annelida	Multi-omics (metabolomics, proteomics)
2021	Qu et al., 2021	10.1016/j.scitotenv.2021.145362	Ag	Chlorella vulgaris (green microalga)	Chlorophyta	Metabolomics
2021	Cao et al., 2021	10.1021/acs.est.1c04059	Ag	Chlorella pyrenoidosa	Chlorophyta	Multi-omics (transcriptomics, metabolomics)	repeated exposure
2021	Li et al., 2021	10.1016/j.ecoenv.2021.112548	Ag	Cyprinus carpio (Eurasian carp)	Chordata	Metabolomics
2021	Xiang et al., 2021	10.1016/j.aquatox.2021.105895	Ag	Cyprinus carpio (Eurasian carp)	Chordata	Multi-omics (transcriptomics, metabolomics)
2021	Piersanti et al., 2021	10.1016/j.envpol.2020.115965	Ag	Tetrahymena thermophila	Ciliophora	Transcriptomics
2021	Liu et al., 2021	10.1016/j.jhazmat.2020.123809	Ag	Nostoc sp.	Cyanobacteria	Proteomics
2021	Barros et al., 2021	10.1016/j.envpol.2020.115913	Ag	Articulospora tetracladia	Fungi	Transcriptomics
2021	Chen et al., 2021	10.1016/j.ejop.2021.125792	Ag	Paramecium multimicronucleatum	Protozoa	Transcriptomics
2021	Zhang et al., 2021	10.1016/j.envpol.2020.116335	Al2O3	Caenorhabditis elegans	Nematoda	Transcriptomics
2021	Ferrari et al., 2021	10.3390/nano11123161	Au	Arabidopsis thaliana (mouse-ear cress)	Streptophyta	Multi-omics (transcriptomics, proteomics)
2021	Li et al., 2021	10.1021/acs.est.0c08493	carbon (graphene oxide)	Capsicum annuum (pepper)	Streptophyta	Multi-omics (metabolomics, proteomics)
2021	Xu et al., 2021	10.1016/j.scitotenv.2021.146224	carbon (graphene oxide, reduced)	Eisenia fetida (redworm)	Annelida	Metabolomics
2021	Li et al., 2021	10.1016/j.ecoenv.2021.112904	carbon (graphene)	Mytilus galloprovincialis (Mediterranean mussel)	Mollusca	Metabolomics	co-exposure with PAH
2021	Chen et al., 2021	10.1016/j.ecoenv.2021.112348	carbon (graphene)	Medicago sativa L. (alfalfa)	Streptophyta	Multi-omics (transcriptomics, metabolomics)
2021	Cherati et al., 2021	10.1021/acsabm.1c00108	carbon (graphene)	Sorghum bicolor	Streptophyta	Transcriptomics
2021	Cherati et al., 2021	10.1021/acsabm.1c00108	carbon (graphene)	Solanum lycopersicum L. (tomato)	Streptophyta	Transcriptomics
2021	Cherati et al., 2021	10.1021/acsabm.1c00108	carbon (graphene)	Oryza sativa L. (rice)	Streptophyta	Transcriptomics
2021	Yang et al., 2021	10.1016/j.ecoenv.2021.112441	carbon (MWCNT)	Eisenia fetida (redworm)	Annelida	Metabolomics	co-exposure
2021	Ke et al., 2021	10.1016/j.scitotenv.2021.145156	carbon (MWCNT)	Arabidopsis thaliana (mouse-ear cress)	Streptophyta	Metabolomics
2021	Zhao et al., 2021	10.1016/j.ecoenv.2021.112948	carbon (MWCNT)	Paeonia ostii T. Hong et J. X. Zhang	Streptophyta	Metabolomics
2021	Yang et al., 2021	10.1016/j.scitotenv.2021.147510	carbon (MWCNT)	Arabidopsis thaliana (mouse-ear cress)	Streptophyta	Transcriptomics
2021	Cherati et al., 2021	10.1021/acsabm.1c00108	carbon (MWCNT)	Sorghum bicolor	Streptophyta	Transcriptomics
2021	Cherati et al., 2021	10.1021/acsabm.1c00108	carbon (MWCNT)	Solanum lycopersicum L. (tomato)	Streptophyta	Transcriptomics
2021	Cherati et al., 2021	10.1021/acsabm.1c00108	carbon (MWCNT)	Oryza sativa L. (rice)	Streptophyta	Transcriptomics
2021	Xu et al., 2021	10.1016/j.scitotenv.2021.146224	carbon (SWCNT)	Eisenia fetida (redworm)	Annelida	Metabolomics
2021	Gonzalez-Grandio et al., 2021	10.1186/s12951-021-01178-8	carbon (SWCNT)	Arabidopsis thaliana (mouse-ear cress)	Streptophyta	Transcriptomics
2021	Xu et al., 2021	10.1016/j.scitotenv.2021.146224	carbon black	Eisenia fetida (redworm)	Annelida	Metabolomics
2021	Chatzimitakos et al., 2021	10.3390/nano11020483	carbon nanodots	Danio rerio (zebrafish)	Chordata	Metabolomics
2021	Morel et al., 2021	10.1016/j.impact.2020.100228	CeO2	Chlamydomonas reinhardtii (green microalga)	Chlorophyta	Transcriptomics
2021	Della Torre et al, 2021	10.1016/j.scitotenv.2021.145612	CeO2	Dreissena polymorpha (zebra mussel)	Mollusca	Metabolomics
2021	Wang et al., 2021	10.1021/acs.est.1c04431	Cu(OH)2	Danio rerio (zebrafish)	Chordata	Metabolomics
2021	Majumdar et al., 2021	10.1021/acs.est.1c00839	Cu(OH)2	Glycine max L. (soybean)	Streptophyta	Multi-omics (metabolomics, proteomics)
2021	Xiong et al., 2021	10.3390/ijms22073688	CuO	Lactuca sativa L. (lettuce)	Streptophyta	Transcriptomics
2021	Yuan et al., 2021	10.1039/d0en01241f	CuO	Oryza sativa L. (rice)	Streptophyta	Metabolomics
2021	Zhabg et al., 2021	10.1016/j.scitotenv.2020.144347	Fe, zerovalent	Eisenia fetida (redworm)	Annelida	Metabolomics	co-exposure with PCB77
2021	Wang et al., 2021	10.1016/j.impact.2021.100336	Fe, zerovalent	Zea mays (maize)	Streptophyta	Metabolomics
2021	Wu et al., 2021	10.1039/d1en00077b	Fe, zerovalent	Medicago sativa L. (alfalfa)	Streptophyta	Metabolomics
2021	Wu et al., 2021	10.1016/j.envpol.2021.117749	Fe2O3	Tetrahymena thermophila	Protozoa	Proteomics
2021	Xiao et al., 2021	10.1016/j.jhazmat.2020.124971	La2O3	Raphanus sativus L. (radish)	Streptophyta	Transcriptomics
2021	Niemuth et al., 2021	10.1021/acs.chemrestox.1c00189	LiCoO2	Daphnia magna	Arthropoda	Multi-omics (transcriptomics, metabolomics)
2021	Huang et al., 2021	10.1021/acs.est.1c00803	MoO3	Zea mays (maize)	Streptophyta	Metabolomics
2021	Huang et al., 2021	10.1021/acs.est.1c00803	MoO3	Triticum aestivum (wheat)	Streptophyta	Metabolomics
2021	Chen et al., 2021	10.1021/acsnano.1c05656	MoS2	Nostoc sphaeroides	Cyanobacteria	Metabolomics
2021	Luo et al. 2021	10.1016/j.jhazmat.2020.124014	MoS2	Dunaliella salina	Chlorophyta	Transcriptomics
2021	Zhang et al., 2021	10.1016/j.chemosphere.2020.129473	Nanodiamonds	Chlorella pyrenoidosa	Chlorophyta	Transcriptomics
2021	Liu et al., 2021	10.1016/j.scitotenv.2020.144249	polystyrene nanoplastics	Daphnia pulex	Arthropoda	Proteomics
2021	Capanni et al., 2021	10.1016/j.scitotenv.2021.147984	polystyrene nanoplastics	Procambarus clarkii (red swamp crayfish)	Arthropoda	Transcriptomics
2021	Liu et al., 2021	10.1016/j.jhazmat.2020.123778	polystyrene nanoplastics	Daphnia pulex	Arthropoda	Transcriptomics
2021	Yang et al., 2021	10.1016/j.scitotenv.2021.146919	polystyrene nanoplastics	Chlorella pyrenoidosa	Chlorophyta	Transcriptomics
2021	Yang et al., 2021	10.1016/j.envpol.2021.117413	polystyrene nanoplastics	Chlorella pyrenoidosa	Chlorophyta	Transcriptomics
2021	Pang et al.. 2021	10.1016/j.envpol.2021.116860	polystyrene nanoplastics	Oreochromis mossambicus (Mozambique tilapia)	Chordata	Multi-omics (transcriptomics, metabolomics)
2021	Hu et al., 2021	10.1016/j.envpol.2020.116075	polystyrene nanoplastics	Danio rerio (zebrafish)	Chordata	Transcriptomics
2021	You et al., 2021	10.1016/j.envint.2021.106842	polystyrene nanoplastics	Synechocystis sp.	Cyanobacteria	Metabolomics	co-exposure
2021	Jiang et al., 2021	10.1016/j.envpol.2021.117631	polystyrene nanoplastics	Sinonovacula constricta (razor clam)	Mollusca	Multi-omics (transcriptomics, metabolomics)
2021	Wu et al., 2021	10.1016/j.jhazmat.2020.123923	polystyrene nanoplastics	Tetrahymena thermophila	Protozoa	Transcriptomics
2021	Jeong et al., 2021	10.1016/j.jhazmat.2021.125703	polystyrene nanoplastics	Brachionus koreanus (rotifer)	Rotifera	Transcriptomics	co-exposure
2021	Zhou et a;., 2021	10.1016/j.jhazmat.2020.123412	polystyrene nanoplastics	Oryza sativa L. (rice)	Streptophyta	Transcriptomics
2021	Tamayo-Belda et al., 2021	10.1039/d1en00284h	polystyrene nanoplastics	Anabaena sp. (cyanobacterium)	Cyanobacteria	Proteomics
2021	Li et al., 2021	10.1002/fes3.269	SiO2	Cucumis sativus L. (cucumber)	Streptophyta	Metabolomics
2021	Cheng et al., 2021	10.1016/j.scitotenv.2021.144967	SiO2	Oryza sativa L. (rice)	Streptophyta	Transcriptomics
2021	Zhu et al., 2021	10.1016/j.ecoenv.2020.111462	TiO2	Eisenia fetida (redworm)	Annelida	Transcriptomics
2021	Xu et al., 2021	10.1016/j.envpol.2021.116508	TiO2	Synechocystis sp.	Cyanobacteria	Transcriptomics
2021	Zhang et al., 2021	10.1016/j.envpol.2021.116936	TiO2	Physarum polycephalum	Protozoa	Multi-omics (transcriptomics, metabolomics)
2021	Nazari et al., 2021	10.1016/j.aquaculture.2021.737017	ZnO	Oncorhynchus mykiss (rainbow trout)	Chordata	Transcriptomics
2021	Wu et al., 2021	10.1016/j.scitotenv.2021.149786	ZnO	Mytilus edulis (blue mussel)	Mollusca	Transcriptomics
2021	Li et al., 2021	10.1002/fes3.269	ZnO	Cucumis sativus L. (cucumber)	Streptophyta	Metabolomics
2021	Salehi et al., 2021	10.1016/j.scitotenv.2021.146331	ZnO	Phaseolus vulgaris L. (common bean)	Streptophyta	Multi-omics (metabolomics, proteomics)
2022	Cao et al., 2022	10.1039/d2en00450j	Ag	Chlorella pyrenoidosa	Chlorophyta	Multi-omics (transcriptomics, metabolomics)
2022	Li et al., 2022	10.1016/j.envpol.2022.118954	Ag	Pheretima guillemi (earthworm)	Annelida	Metabolomics
2022	Yan et al., 2022	10.1039/d2en00211f	Ag	Oryza sativa L. (rice)	Streptophyta	Metabolomics
2022	Lahuta et al., 2022	10.3390/molecules27072303	Ag	Triticum aestivum (wheat)	Streptophyta	Metabolomics
2022	Huang et al., 2022	10.1016/j.jes.2021.09.008	bismuth oxyiodide	Chlamydomonas reinhardtii (green microalga)	Chlorophyta	Metabolomics
2022	Zhang et al., 2022	10.1016/j.plaphy.2022.01.023	black P	Chlorella vulgaris (green microalga)	Chlorophyta	Metabolomics
2022	Chen et al., 2022	10.1016/j.scitotenv.2021.151103	carbon (graphene oxide)	Danio rerio (zebrafish)	Chordata	Metabolomics	Co-exposure
2022	Chen et al., 2022	10.1016/j.chemosphere.2021.133368	carbon (graphene)	Medicago sativa L. (alfalfa)	Streptophyta	Multi-omics (transcriptomics, metabolomics)
2022	Zhang et al., 2022	10.1016/j.chemosphere.2021.132516	carbon (MWCNT)	Microcystis aeruginosa	Cyanobacteria	Transcriptomics
2022	Zhao et al., 2022	10.1016/j.scitotenv.2022.158405	carbon (MWCNT)	Medicago sativa L. (alfalfa)	Streptophyta	Metabolomics	co-exposure with pyrene
2022	Chen et al., 2022	10.1016/j.jhazmat.2022.129640	carbon (MWCNT)	Solanum nigrum	Streptophyta	Multi-omics (transcriptomics, metabolomics)	co-exposure with Cd and As
2022	Yang et al., 2022	10.1016/j.ecoenv.2022.114158	carbon (MWCNT)	Eisenia fetida (redworm)	Annelida	Metabolomics
2022	Dai et al., 2022	10.1016/j.scitotenv.2021.152494	CeO2	Fragaria x ananassa Duch. (strawberry)	Streptophyta	Proteomics
2022	Li et al., 2022	10.1016/j.jhazmat.2022.129354	CeO2	Eisenia fetida (redworm)	Annelida	Multi-omics (transcriptomics, metabolomics, and 16 S rRNA sequencing)
2022	Kong et al., 2022	10.1039/d1en01203g	CuS	Danio rerio (zebrafish)	Chordata	Metabolomics
2022	Jenne et al., 2022	10.1002/mrc.5315	Fe oxide, superparamagnetic (SPION)	Daphnia magna	Arthropoda	Metabolomics
2022	Cao et al., 2022	10.1021/acsnano.1c08977	Fe2O3	Glycine max L. (soybean)	Streptophyta	Multi-omics (transcriptomics, metabolomics)
2022	Wang et al., 2022	10.3389/fnut.2022.1013756	Fe3O4	Dendrobium huoshanense	Streptophyta	Metabolomics
2022	Deng et al., 2022	10.1007/s11783-022-1569-9	Fe3O4	Cannabis sativa (hemp)	Streptophyta	Metabolomics
2022	Wang et al., 2022	10.3390/nano12081341	Fe7(PO4)6	Solanum lycopersicum L. (tomato)	Streptophyta	Multi-omics (transcriptomics, metabolomics)
2022	Xiao et al., 2022	10.1021/acs.est.2c05828	La2O3	Raphanus sativus L. (radish)	Streptophyta	Metabolomics
2022	Wang et al., 2022	10.1039/d2en00251e	MnFe2O4	Nicotiana tabacum (tobacco) cell suspension	Streptophyta	Metabolomics
2022	Li et al., 2022	10.1016/j.jhazmat.2021.126846	MOF (ZIF)	Chlorella vulgaris (green microalga)	Chlorophyta	Multi-omics (transcriptomics, metabolomics)
2022	Zhao et al., 2022	10.1016/j.chemosphere.2021.133004	MoS2	Oryza sativa L. (rice)	Streptophyta	Metabolomics
2022	Zhao et al., 2022	10.1016/j.scitotenv.2021.150252	polymethyl methacrylate	Karenia mikimotoi	Protozoa	Transcriptomics
2022	Sulukan et al., 2022	10.1016/j.scitotenv.2021.152092	polystyrene nanoplastics	Danio rerio (zebrafish)	Chordata	Metabolomics	co-exposure
2022	Zhang et al., 2022	10.1016/j.chemosphere.2021.132516	polystyrene nanoplastics	Microcystis aeruginosa	Cyanobacteria	Transcriptomics	co-exposure
2022	Cao et al., 2022	10.1016/j.jhazmat.2021.127937	polystyrene nanoplastics	Euglena gracilis	Protozoa	Metabolomics	co-exposure
2022	Zhao et al., 2022	10.1016/j.scitotenv.2021.150252	polystyrene nanoplastics	Karenia mikimotoi	Protozoa	Transcriptomics
2022	Zhang et al., 2022	10.1016/j.scitotenv.2021.150895	polystyrene nanoplastics	Zea mays (maize)	Streptophyta	Metabolomics
2022	Lian et al., 2022	10.1016/j.jhazmat.2021.127241	polystyrene nanoplastics	Triticum aestivum (wheat)	Streptophyta	Transcriptomics
2022	Teng et al., 2022	10.1021/acsnano.2c01872	polystyrene nanoplastics	Danio rerio (zebrafish)	Chordata	Metabolomics
2022	Najafi et al., 2022	10.1007/s12668-021-00918-2	S	Lactuca sativa L. (lettuce)	Streptophyta	Metabolomics
2022	Wang et al., 2022	10.1021/acsnano.2c04073	S	Solanum lycopersicum L. (tomato)	Streptophyta	Metabolomics
2022	Li et al., 2022	10.1016/j.jprot.2022.104545	Se	Oncorhynchus mykiss (rainbow trout)	Chordata	Metabolomics
2022	Cheng et al., 2022	10.1016/j.scitotenv.2022.153712	Se	Raphanus sativus L. (radish)	Streptophyta	Multi-omics (transcriptomics, metabolomics)
2022	Liu et al., 2022	10.1039/d2en00260d	TiO2	Chlamydomonas reinhardtii (green microalga)	Chlorophyta	Metabolomics
2022	Sawati et al., 2022	10.3389/fpls.2022.798751	Zn	Brassica napus (rapeseed)	Streptophyta	Multi-omics (transcriptomics, proteomics)
2022	Qi et al., 2022	10.1016/j.chemosphere.2021.133362	ZnO	Daphnia magna	Arthropoda	Transcriptomics	transgenerational
2022	Wang et al., 2022	10.1016/j.aquatox.2022.106333	ZnO	Danio rerio (zebrafish)	Chordata	Metabolomics
2023	Ding et al., 2023	10.1016/j.scitotenv.2023.164139	Ag	Euglena sp.	Protozoa	Metabolomics	mixture toxicity
2023	Wei et al., 2023	10.1016/j.marenvres.2023.106120	Ag	Navicula sp. (diatom)	Ochrophyta	Metabolomics
2023	Chen et al., 2023	10.1021/acsnano.3c02215	Ag	Oryza sativa L. (rice)	Streptophyta	Multi-omics (transcriptomics, metabolomics)
2023	Yan et al., 2023	10.1021/acsnano.2c09181	Ag	Oryza sativa L. (rice)	Streptophyta	Multi-omics (transcriptomics, metabolomics)
2023	Wu et al., 2023	10.1016/j.jhazmat.2022.130298	carbon (graphene oxide)	Chlorella vulgaris (green microalga)	Chlorophyta	Multi-omics (transcriptomics, metabolomics)
2023	Chen et al., 2023	10.1016/j.scitotenv.2023.165684	carbon (MWCNT)	Danio rerio (zebrafish)	Chordata	Metabolomics
2023	Ouyang et al., 2023	10.1016/j.jhazmat.2023.131421	CdS	Capsicum frutescens L. (chili)	Streptophyta	Metabolomics
2023	Cai et al., 2023	10.1016/j.jhazmat.2022.129985	CeO2	Glycine max L. (soybean)	Streptophyta	Metabolomics
2023	Xu et al., 2023	10.1016/j.chemosphere.2023.138576	CeO2	Triticum aestivum (wheat)	Streptophyta	Metabolomics
2023	Xu et al., 2023	10.1016/j.chemosphere.2023.138576	CuO	Triticum aestivum (wheat)	Streptophyta	Metabolomics
2023	Zhang et al., 2023	10.1016/j.scitotenv.2022.159226	Fe, zerovalent	Eisenia fetida (redworm)	Annelida	Metabolomics	co-exposure with polychlorinated biphenyls (PCBs)
2023	Qian et al., 2023	10.1016/j.scitotenv.2023.163089	Fe, zerovalent	Oryza sativa L. (rice)	Streptophyta	Metabolomics
2023	Guo et al., 2023	10.1021/acs.est.2c08747	Fe2O3	Tetrahymena thermophila	Protozoa	Transcriptomics
2023	Lu et al., 2023	10.1016/j.envpol.2023.122578	Fe3O4	Panax notoginseng	Streptophyta	Metabolomics
2023	Luo et al., 2023	10.1021/acsnano.2c11790	La2O3	Cucumis sativus L. (cucumber)	Streptophyta	Multi-omics (transcriptomics, metabolomics)
2023	Sun et al., 2023	10.1021/acsnano.2c10623	MoS2	Eisenia fetida (redworm)	Annelida	Multi-omics (transcriptomics, metabolomics)
2023	Zou et al., 2023	10.1016/j.chemosphere.2023.138166	MoS2	Oryza sativa L. (rice)	Streptophyta	Multi-omics (transcriptomics, metabolomics)
2023	Gong et al., 2023	10.1016/j.chemosphere.2023.138736	MoS2	Triticum aestivum (wheat)	Streptophyta	Metabolomics
2023	Xu et al., 2023	10.1039/d2en00542e	nanoplastics	Danio rerio (zebrafish)	Chordata	Metabolomics
2023	Bashirova et al., 2023	10.1038/s41598-023-28712-y	polyethylene terephthalate	Danio rerio (zebrafish)	Chordata	Metabolomics
2023	Tang et al., 2023	10.1016/j.jhazmat.2022.130034	polystyrene nanoplastics	Eisenia fetida (redworm)	Annelida	Multi-omics (transcriptomics, proteomics, metabolomics)
2023	Kelpsiene et al., 2023	10.1039/d3en00142c	polystyrene nanoplastics	Daphnia magna	Arthropoda	Metabolomics
2023	Yang et al., 2023	10.1016/j.envexpbot.2023.105382	polystyrene nanoplastics	Chlorella vulgaris (green microalga)	Chlorophyta	Metabolomics
2023	Yao et al., 2023	10.1016/j.scitotenv.2023.162853	polystyrene nanoplastics	Phaeodactylum tricornutum (diatom)	Ochrophyta	Multi-omics (transcriptomics, metabolomics)
2023	Senol et al., 2023	10.1016/j.scitotenv.2023.164682	polystyrene nanoplastics	Danio rerio (zebrafish)	Chordata	Multi-omics (transcriptomics, metabolomics)
2023	Wang et al., 2023	10.1016/j.scitotenv.2023.162496	polystyrene nanoplastics	Microcystis aeruginosa	Cyanobacteria	Metabolomics
2023	Huang et al., 2023	10.1016/j.scitotenv.2022.161247	polystyrene nanoplastics	Cucumis sativus L. (cucumber)	Streptophyta	Multi-omics (transcriptomics, metabolomics)
2023	Jia et al., 2023	10.1016/j.jhazmat.2023.131140	polystyrene nanoplastics	Eichhornia crassipes (water hyacinth)	Streptophyta	Metabolomics
2023	Sun et al., 2023	10.1016/j.scitotenv.2023.165432	polystyrene nanoplastics	Fragaria x ananassa Duch. (strawberry)	Streptophyta	Multi-omics (transcriptomics, metabolomics)
2023	Qiu et al., 2023	10.1016/j.chemosphere.2022.137571	polystyrene nanoplastics	Glycine max L. (soybean)	Streptophyta	Multi-omics (transcriptomics, metabolomics)
2023	Xu et al., 2023	10.1016/j.envpol.2022.120656	polystyrene nanoplastics	Lactuca sativa L. (lettuce)	Streptophyta	Metabolomics
2023	Li et al., 2023	10.1016/j.scitotenv.2023.167071	polystyrene nanoplastics	Taraxacum officinale	Streptophyta	Metabolomics
2023	Wang et al., 2023	10.1016/j.scitotenv.2023.165521	Se	Zea mays (maize)	Streptophyta	Metabolomics
2023	Yu et al., 2023	10.1016/j.ecoenv.2023.115653	Se	Hylocereus undatus (red pitaya or dragon fruit)	Streptophyta	Metabolomics
2023	Cheng et al., 2023	10.1016/j.impact.2022.100449	Se	Lactuca sativa L. (lettuce)	Streptophyta	Metabolomics
2023	Shiriaev et al., 2023	10.1021/acs.jafc.3c02031	Se	Solanum lycopersicum L. (tomato)	Streptophyta	Multiomics (trascriptomics, metabolomics)
2023	Wang et al., 2023	10.1016/j.scienta.2022.111816	Se	Zea mays (maize)	Streptophyta	Metabolomics
2023	Cai et al., 2023	10.1016/j.jhazmat.2022.129985	SiO2	Glycine max L. (soybean)	Streptophyta	Metabolomics
2023	Wang et al., 2023	10.1039/d3en00504f	SiO2	Oryza sativa L. (rice)	Streptophyta	Multi-omics (transcriptomics, metabolomics)
2023	Yu et al., 2023	10.3389/fpls.2023.1175012	TiO2	Morus alba (mulberry)	Streptophyta	Multi-omics (transcriptomics, metabolomics)
2023	Qiang et al., 2023	10.1016/j.jhazmat.2023.131411	TiO2	Oryza sativa L. (rice)	Streptophyta	Multi-omics (transcriptomics, metabolomics)
2023	Sun et al., 2023	10.1021/acsnano.3c04990	ZnO	Solanum lycopersicum L. (tomato)	Streptophyta	Metabolomics
